# Supplementary material
Source: publisher site journal article supplement (http://spandidos-publications.com/6041/downloadSupplementary)

Figure S1. Western blotting of NICD transfection with overexpression plasmid. NICD, Notch intracellular domain.

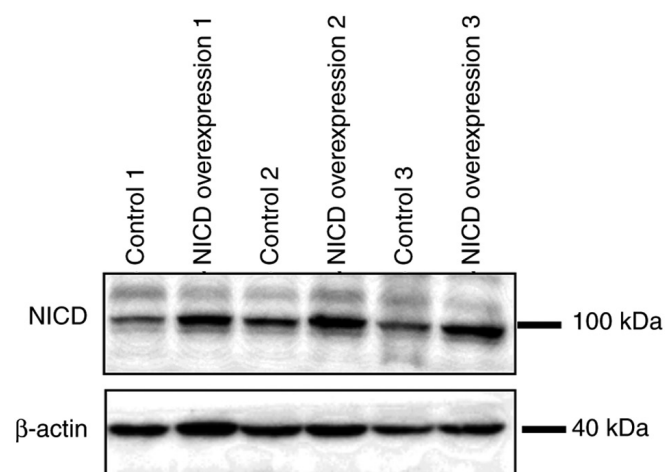

Supplement: Supplementary file 1 [file downloadSupplementary]
